# Supplementary material for: Mieap forms membraneless organelles to compartmentalize and facilitate cardiolipin metabolism
Source: Research Square preprint supplement (doi:10.21203/rs.3.rs-713092/v1), 2021-09-22
Supplement: Supplementary file 1 [file 9069cead30233ad06ed6b3e2.xlsx]

## Sheet: A549_1
Molecular species	Number of total carbon atoms: Number of double bonds	Amounts adjusted with an internal standard, CL(56:0) (pmol/1×107 cells)
		Ad-Mieap	Non-infection
CL(14:0_16:1_18:1_14:0)	62:2	9.81462	6.62825
CL(14:0_16:1_14:0_18:2)	62:3	18.0364	11.5366
CL(16:1_16:1_16:1_14:0)	62:3	0.455887	0.150768
CL(16:1_14:1_16:1_16:1)	62:4	2.00961	1.14746
CL(16:0_16:0_16:0_16:0)	64:0	21.1191	0.0125059
CL(14:0_16:0_16:0_18:1)	64:1	1.30827	3.38948
CL(16:0_16:1_14:0_18:1)	64:2	17.7274	14.7991
CL(14:0_16:1_18:1_16:1)	64:3	99.4507	68.5579
CL(16:1_16:1_16:1_16:1)	64:4	73.9787	51.0638
CL(18:2_14:1_16:1_16:1)	64:5	4.80604	2.95272
CL(14:2_18:2_16:1_16:1)	64:6	0.00658428	0.000280733
CL(18:4_14:0_16:1_16:1)	64:6	1.87951	0.953605
CL(16:0_16:0_18:0_16:0)	66:0	3.72125	0.20328
CL(16:0_16:0_16:0_18:1)	66:1	3.16855	7.72459
CL(14:0_18:1_16:0_18:1)	66:2	47.6828	44.6217
CL(14:0_18:1_16:1_18:1)	66:3	160.59	127.719
CL(18:2_14:0_16:1_18:1)	66:4	374.871	287.411
CL(18:2_16:1_16:1_16:1)	66:5	117.679	71.513
CL(18:2_14:1_16:1_18:2)	66:6	5.19396	3.32447
CL(18:3_16:1_16:1_16:1)	66:6	10.5218	6.84102
CL(14:2_18:2_16:1_18:2)	66:7	7.15757	4.03073
CL(18:3_16:1_18:2_14:1)	66:7	0.51253	0.354314
CL(17:1_16:1_18:2_16:1)	67:5	30.6625	18.8771
CL(18:1_16:0_18:0_16:1)	68:2	200.996	210.963
CL(18:1_16:0_16:1_18:1)	68:3	225.163	213.416
CL(18:1_16:1_16:1_18:1)	68:4	712.324	577.423
CL(18:2_16:1_16:1_18:1)	68:5	413.32	291.283
CL(18:2_16:1_16:1_18:2)	68:6	120.048	71.0697
CL(18:3_18:2_16:1_16:1)	68:7	16.1449	9.82565
CL(18:2_14:1_16:1_20:4)	68:8	10.0309	5.15957
CL(20:5_14:0_16:1_18:2)	68:8	0.370065	0.417849
CL(20:5_16:1_16:1_16:1)	68:8	1.47786	1.06472
CL(20:5_16:1_14:1_18:2)	68:9	0.530724	0.275089
CL(17:0_18:1_18:1_16:0)	69:2	16.6392	13.6141
CL(17:1_16:1_16:1_20:4)	69:7	4.68932	2.82299
CL(20:4_16:1_15:1_18:2)	69:8	1.61689	0.955674
CL(20:5_16:1_18:2_15:0)	69:8	0.606934	0.39273
CL(13:0_22:6_16:1_18:2)	69:9	0.00119018	0.0988475
CL(18:3_16:1_22:6_14:0)	70:10	0.385513	0.20922
CL(18:1_16:0_18:0_18:1)	70:2	46.6186	33.5402
CL(18:1_16:0_18:1_18:1)	70:3	202.231	153.103
CL(18:1_16:1_18:1_18:1)	70:4	718.847	547.872
CL(18:2_18:1_16:1_18:1)	70:5	629.935	471.631
CL(18:2_16:1_18:1_18:2)	70:6	291.418	196.217
CL(18:2_16:1_16:1_20:3)	70:7	91.2461	57.2695
CL(18:3_18:2_16:1_18:1)	70:7	14.5726	11.7583
CL(18:2_16:1_16:1_20:4)	70:8	21.2667	13.3777
CL(18:3_18:2_16:1_18:2)	70:8	14.3289	10.8097
CL(18:4_18:1_16:1_18:2)	70:8	0.537247	0.731383
CL(20:5_16:1_18:2_16:1)	70:9	7.81325	3.90071
CL(19:0_18:1_16:1_18:0)	71:2	0.886715	5.22163
CL(17:1_18:1_18:2_18:1)	71:5	10.4737	6.21454
CL(17:1_18:2_16:1_20:3)	71:7	12.9866	8.48995
CL(17:1_16:1_18:2_20:4)	71:8	3.45348	2.38771
CL(17:1_16:1_16:1_22:6)	71:9	0.836938	0.511229
CL(22:6_15:1_16:1_18:1)	71:9	0.00802266	0.136229
CL(20:5_18:2_16:1_18:2)	72:10	3.11569	2.06147
CL(18:4_18:2_16:1_20:4)	72:11	1.24717	0.657506
CL(18:4_22:6_16:1_16:1)	72:12	1.87676	0.979905
CL(18:1_18:1_18:1_18:1)	72:4	413.32	240.337
CL(18:2_18:1_18:1_18:1)	72:5	444.559	291.105
CL(18:2_18:1_18:2_18:0)	72:5	20.2781	9.53605
CL(18:2_18:1_16:0_20:3)	72:6	24.1984	14.4947
CL(18:2_18:1_18:1_18:2)	72:6	316.512	222.222
CL(20:2_16:1_18:1_18:2)	72:6	33.0209	20.6915
CL(18:2_18:1_16:1_20:3)	72:7	17.8201	13.7943
CL(18:2_18:1_16:1_20:4)	72:8	12.1009	10.0177
CL(18:1_16:1_16:1_22:6)	72:9	18.4174	14.0366
CL(20:5_18:2_16:1_18:1)	72:9	8.61998	6.0727
CL(19:1_18:1_18:1_18:1)	73:4	6.44696	4.44444
CL(17:1_18:1_20:3_18:2)	73:7	3.3965	2.50236
CL(17:1_18:1_18:2_20:4)	73:8	1.64264	1.44592
CL(17:1_18:1_16:1_22:6)	73:9	2.31342	1.81915
CL(18:2_18:1_16:1_22:6)	74:10	12.1181	9.55969
CL(18:2_18:2_16:1_22:6)	74:11	2.09097	1.40396
CL(18:4_22:6_16:1_18:1)	74:12	1.73361	1.03635
CL(20:5_18:2_20:4_16:1)	74:12	1.27841	0.770095
CL(18:4_22:6_16:1_18:2)	74:13	1.83145	0.922281
CL(18:1_18:1_20:1_18:1)	74:4	14.8472	6.31797
CL(20:2_18:1_18:1_18:1)	74:5	37.0409	19.7606
CL(18:1_18:1_20:3_18:1)	74:6	97.0477	65.1891
CL(18:1_20:3_18:2_18:0)	74:6	22.6674	16.6076
CL(18:1_20:3_18:1_18:2)	74:7	19.4713	11.5957
CL(18:2_18:1_20:3_18:2)	74:8	10.8273	7.63889
CL(18:2_18:1_18:2_20:4)	74:9	6.34398	4.86998
CL(17:1_18:1_20:3_20:3)	75:8	0.591486	0.176064
CL(17:1_18:1_18:1_22:6)	75:9	1.50326	1.15337
CL(17:1_20:4_18:1_20:3)	75:9	0.17954	0.0710106
CL(18:2_20:3_18:1_20:4)	76:10	5.04291	4.02187
CL(18:2_18:1_18:2_22:6)	76:11	3.8105	2.97872
CL(22:6_20:4_16:0_18:1)	76:11	0.775146	0.416371
CL(18:1_16:1_20:4_22:6)	76:12	1.80673	1.01123
CL(18:2_22:6_16:1_20:3)	76:12	0.435977	0.31117
CL(18:4_22:6_18:1_18:2)	76:13	1.41916	0.763593
CL(20:5_18:2_22:6_16:1)	76:14	1.092	0.508865
CL(18:2_20:3_18:1_20:1)	76:7	1.69653	0.731087
CL(20:2_18:1_20:3_18:1)	76:7	6.21009	3.7766
CL(20:2_18:2_18:1_20:3)	76:8	9.16238	6.37411
CL(18:2_18:1_20:3_20:3)	76:9	10.4943	8.3156
CL(18:1_16:1_22:5_22:5)	78:12	1.93169	0.693853
CL(20:5_22:6_18:1_18:1)	78:13	1.21181	0.580378
Total		6407.71	4689.75

## Sheet: A549_2
Molecular species	Number of total carbon atoms: Number of double bonds	Amounts adjusted with an internal standard, CL(56:0) (pmol/1×107 cells)
		Ad-Mieap	Non-infection
CL(14:0_16:1_14:0_18:1)	62:2	9.42623	8.86201
CL(14:0_16:1_16:1_16:1)	62:3	20.0342	17.8065
CL(16:0_16:0_16:0_16:0)	64:0	8.98907	0.579439
CL(14:0_16:0_16:0_18:1)	64:1	1.68101	6.39912
CL(16:0_16:1_14:0_18:1)	64:2	13.7022	17.4986
CL(14:0_16:1_16:1_18:1)	64:3	92.8962	74.2716
CL(16:1_16:1_16:1_16:1)	64:4	89.071	75.3711
CL(16:1_16:1_18:2_14:1)	64:5	4.66052	4.22705
CL(16:0_16:0_16:0_18:1)	66:1	2.93579	15.3271
CL(14:0_18:1_16:0_18:1)	66:2	42.3224	52.7048
CL(14:0_18:1_16:1_18:1)	66:3	136.68	129.082
CL(18:1_16:1_14:0_18:2)	66:4	459.29	354.151
CL(18:2_16:1_16:1_16:1)	66:5	126.913	81.0885
CL(18:2_14:1_16:1_18:2)	66:6	11.0041	7.95492
CL(18:3_16:1_18:2_14:1)	66:7	3.65915	4.4486
CL(18:1_16:0_16:0_18:1)	68:2	218.033	239.857
CL(18:1_16:0_16:1_18:1)	68:3	193.101	213.304
CL(18:1_16:1_16:1_18:1)	68:4	841.53	671.798
CL(18:2_16:1_16:1_18:1)	68:5	470.287	284.332
CL(18:2_16:1_16:1_18:2)	68:6	126.093	66.1902
CL(18:3_18:2_16:1_16:1)	68:7	20.5874	12.8752
CL(20:5_16:1_16:1_16:1)	68:8	5.75956	5.13469
CL(17:1_16:1_16:1_20:4)	69:7	4.84016	2.55745
CL(18:1_16:0_18:0_18:1)	70:2	43.9549	54.4035
CL(18:1_16:0_18:1_18:1)	70:3	171.448	151.292
CL(18:1_16:1_18:1_18:1)	70:4	894.126	649.258
CL(18:2_18:1_16:1_18:1)	70:5	543.579	359.978
CL(18:1_16:1_18:2_18:2)	70:6	308.333	160.308
CL(18:2_16:1_16:1_20:3)	70:7	93.9208	46.7784
CL(18:2_16:1_16:1_20:4)	70:8	23.8456	12.9302
CL(18:3_18:2_16:1_18:2)	70:8	5.36885	4.60528
CL(20:5_18:2_16:1_16:1)	70:9	4.96175	2.75866
CL(17:1_18:1_20:0_16:1)	71:3	43.6407	26.4541
CL(17:1_18:1_18:1_18:1)	71:4	34.2896	19.1149
CL(17:1_18:1_18:2_18:1)	71:5	84.0164	47.1358
CL(17:1_18:2_16:1_20:3)	71:7	12.8074	5.72292
CL(17:1_18:2_16:1_20:4)	71:8	4.42418	2.40682
CL(18:2_16:1_16:1_22:6)	72:10	5.32992	2.87576
CL(18:1_18:1_18:1_18:1)	72:4	330.874	200.275
CL(18:2_18:1_18:1_18:1)	72:5	358.743	197.031
CL(18:2_18:1_18:1_18:2)	72:6	325.273	174.382
CL(18:2_18:1_16:1_20:3)	72:7	131.421	64.3211
CL(18:1_16:1_18:2_20:4)	72:8	55.4645	27.8944
CL(20:5_18:2_16:1_18:1)	72:9	24.0164	13.9857
CL(19:1_18:1_18:0_18:2)	73:4	15.4918	9.14788
CL(17:1_20:3_18:2_18:1)	73:7	11.776	5.40407
CL(17:1_18:2_18:1_20:4)	73:8	5.16462	2.46454
CL(17:1_22:6_16:1_18:1)	73:9	2.54508	1.35184
CL(18:2_18:1_16:1_22:6)	74:10	12.4385	6.55305
CL(18:2_18:2_16:1_22:6)	74:11	2.91257	1.09511
CL(20:2_18:1_18:2_18:0)	74:5	25.0683	15.4316
CL(18:1_18:1_20:3_18:1)	74:6	71.4481	40.066
CL(18:2_18:1_20:3_18:1)	74:7	81.9672	38.5377
CL(18:2_18:1_16:1_22:5)	74:9	29.112	16.0033
CL(18:2_18:1_22:6_18:1)	76:10	8.06694	4.05223
CL(18:2_22:6_18:2_18:1)	76:11	3.6653	1.80539
CL(20:2_18:1_20:3_18:1)	76:7	7.37705	3.86311
CL(18:1_20:3_18:1_20:3)	76:8	11.2158	5.37823
CL(18:2_20:3_18:1_20:3)	76:9	12.9372	6.76745
Total		6704.52	4727.65

## Sheet: LS174T_1
Molecular species	Number of total carbon atoms: Number of double bonds	Amounts adjusted with an internal standard, CL(56:0) (pmol/1×107 cells)
		Control	Mieap-KD
CL(14:0_16:1_18:1_14:0)	62:2	7.06954	5.6422
CL(14:0_16:1_14:0_18:2)	62:3	43.2947	48.817
CL(16:1_16:1_16:1_14:0)	62:3	4.34879	4.2395
CL(16:1_14:1_16:1_16:1)	62:4	10.4001	14.8069
CL(16:0_16:0_16:0_16:0)	64:0	0.00138714	0.000348382
CL(14:0_16:0_16:0_18:1)	64:1	0.678256	0.401255
CL(16:0_16:1_14:0_18:1)	64:2	6.39073	4.9155
CL(14:0_16:1_18:1_16:1)	64:3	93.2671	79.6958
CL(16:1_16:1_16:1_16:1)	64:4	207.643	228.199
CL(18:2_14:1_16:1_16:1)	64:5	11.6694	16.6465
CL(14:2_18:2_16:1_16:1)	64:6	0.206512	0.362868
CL(18:4_14:0_16:1_16:1)	64:6	2.03615	2.51328
CL(16:0_16:0_18:0_16:0)	66:0	0.000424393	0.000281024
CL(16:0_16:0_16:0_18:1)	66:1	0.908113	0.431917
CL(14:0_18:1_16:0_18:1)	66:2	12.1744	8.20859
CL(14:0_18:1_16:1_18:1)	66:3	90.3698	68.6383
CL(18:2_14:0_16:1_18:1)	66:4	506.347	445.196
CL(18:2_16:1_16:1_16:1)	66:5	170.143	182.569
CL(18:2_14:1_16:1_18:2)	66:6	2.42467	1.93844
CL(18:3_16:1_16:1_16:1)	66:6	17.2075	20.9464
CL(14:2_18:2_16:1_18:2)	66:7	8.83002	10.4225
CL(18:3_16:1_18:2_14:1)	66:7	1.56623	1.40174
CL(17:1_16:1_18:2_16:1)	67:5	54.6634	75.3742
CL(18:1_16:0_18:0_16:1)	68:2	36.2307	20.4925
CL(18:1_16:0_16:1_18:1)	68:3	90.5353	65.2583
CL(18:1_16:1_16:1_18:1)	68:4	660.044	518.107
CL(18:2_16:1_16:1_18:1)	68:5	331.954	289.474
CL(18:2_16:1_16:1_18:2)	68:6	105.408	112.506
CL(18:3_18:2_16:1_16:1)	68:7	16.2666	19.3312
CL(18:2_14:1_16:1_20:4)	68:8	6.81291	7.46499
CL(20:5_14:0_16:1_18:2)	68:8	0.36617	0.279092
CL(20:5_16:1_16:1_16:1)	68:8	1.99696	2.59295
CL(20:5_16:1_14:1_18:2)	68:9	0.413079	0.770884
CL(17:0_18:1_18:1_16:0)	69:2	18.1512	20.1642
CL(17:1_16:1_16:1_20:4)	69:7	5.44702	8.56591
CL(20:4_16:1_15:1_18:2)	69:8	1.4564	2.04442
CL(20:5_16:1_18:2_15:0)	69:8	0.6617	1.24239
CL(13:0_22:6_16:1_18:2)	69:9	0.0487583	0.0235611
CL(18:3_16:1_22:6_14:0)	70:10	0.0928532	0.107871
CL(18:1_16:0_18:0_18:1)	70:2	3.78311	1.85538
CL(18:1_16:0_18:1_18:1)	70:3	43.819	29.5992
CL(18:1_16:1_18:1_18:1)	70:4	387.141	269.676
CL(18:2_18:1_16:1_18:1)	70:5	355.408	276.195
CL(18:2_16:1_18:1_18:2)	70:6	155.988	145.968
CL(18:2_16:1_16:1_20:3)	70:7	49.1722	53.0903
CL(18:3_18:2_16:1_18:1)	70:7	10.0552	8.48865
CL(18:2_16:1_16:1_20:4)	70:8	12.3841	14.7441
CL(18:3_18:2_16:1_18:2)	70:8	6.91777	5.9802
CL(18:4_18:1_16:1_18:2)	70:8	0.467439	0.367938
CL(20:5_16:1_18:2_16:1)	70:9	3.28366	3.57074
CL(19:0_18:1_16:1_18:0)	71:2	2.01187	0.813858
CL(17:1_18:1_18:2_18:1)	71:5	9.23841	12.2549
CL(17:1_18:2_16:1_20:3)	71:7	10.8333	16.1589
CL(17:1_16:1_18:2_20:4)	71:8	2.42163	4.01497
CL(17:1_16:1_16:1_22:6)	71:9	0.737859	1.49372
CL(22:6_15:1_16:1_18:1)	71:9	0.059106	2.41429e-07
CL(20:5_18:2_16:1_18:2)	72:10	1.54719	2.17866
CL(18:4_18:2_16:1_20:4)	72:11	0.582781	0.561564
CL(18:4_22:6_16:1_16:1)	72:12	0.995309	0.818445
CL(18:1_18:1_18:1_18:1)	72:4	84.2439	48.4066
CL(18:2_18:1_18:1_18:1)	72:5	133.278	92.4191
CL(18:2_18:1_18:2_18:0)	72:5	3.43543	2.56881
CL(18:2_18:1_16:0_20:3)	72:6	7.19371	6.71415
CL(18:2_18:1_18:1_18:2)	72:6	115.397	100.652
CL(20:2_16:1_18:1_18:2)	72:6	11.2252	10.4225
CL(18:2_18:1_16:1_20:3)	72:7	11.5094	9.82859
CL(18:2_18:1_16:1_20:4)	72:8	6.90121	5.72429
CL(18:1_16:1_16:1_22:6)	72:9	7.56623	9.0705
CL(20:5_18:2_16:1_18:1)	72:9	3.06015	2.77885
CL(19:1_18:1_18:1_18:1)	73:4	4.28808	4.09705
CL(17:1_18:1_20:3_18:2)	73:7	3.45199	3.90874
CL(17:1_18:1_18:2_20:4)	73:8	1.79608	2.19266
CL(17:1_18:1_16:1_22:6)	73:9	1.34575	2.31241
CL(18:2_18:1_16:1_22:6)	74:10	3.14018	3.73974
CL(18:2_18:2_16:1_22:6)	74:11	0.542219	0.820859
CL(18:4_22:6_16:1_18:1)	74:12	1.01821	0.775954
CL(20:5_18:2_20:4_16:1)	74:12	0.449779	0.354901
CL(18:4_22:6_16:1_18:2)	74:13	0.653698	0.500966
CL(18:1_18:1_20:1_18:1)	74:4	1.68819	0.840898
CL(20:2_18:1_18:1_18:1)	74:5	7.82285	5.02656
CL(18:1_18:1_20:3_18:1)	74:6	23.7997	19.4809
CL(18:1_20:3_18:2_18:0)	74:6	6.78532	6.47513
CL(18:1_20:3_18:1_18:2)	74:7	5.6457	4.40367
CL(18:2_18:1_20:3_18:2)	74:8	5.24007	4.35538
CL(18:2_18:1_18:2_20:4)	74:9	2.64321	2.58571
CL(17:1_18:1_20:3_20:3)	75:8	0.587748	0.733221
CL(17:1_18:1_18:1_22:6)	75:9	0.564294	1.11516
CL(17:1_20:4_18:1_20:3)	75:9	0.296634	0.537663
CL(18:2_20:3_18:1_20:4)	76:10	0.605132	0.743361
CL(18:2_18:1_18:2_22:6)	76:11	0.428256	0.658619
CL(22:6_20:4_16:0_18:1)	76:11	0.159658	0.148093
CL(18:1_16:1_20:4_22:6)	76:12	0.900662	0.723081
CL(18:2_22:6_16:1_20:3)	76:12	0.0210044	0.019126
CL(18:4_22:6_18:1_18:2)	76:13	0.565673	0.408257
CL(20:5_18:2_22:6_16:1)	76:14	0.272047	0.220304
CL(18:2_20:3_18:1_20:1)	76:7	0.195006	0.13211
CL(20:2_18:1_20:3_18:1)	76:7	1.59934	1.51352
CL(20:2_18:2_18:1_20:3)	76:8	2.12445	2.50604
CL(18:2_18:1_20:3_20:3)	76:9	1.99614	2.35538
CL(18:1_16:1_22:5_22:5)	78:12	0.298013	0.239401
CL(20:5_22:6_18:1_18:1)	78:13	0.36755	0.304442
Total		4049.48	3500.44

## Sheet: LS174T_2
Molecular species	Number of total carbon atoms: Number of double bonds	Amounts adjusted with an internal standard, CL(56:0) (pmol/1×107 cells)
		Control	Mieap-KD
CL(15:0_16:1_15:0_16:1)	62:2	8.42083	7.53646
CL(14:0_16:1_16:1_16:1)	62:3	29.5125	22.2937
CL(16:1_16:1_16:1_14:1)	62:4	7.15417	7.17492
CL(16:0_16:0_16:0_16:0)	64:0	4.16667e-07	5.0922e-07
CL(14:0_16:0_16:0_18:1)	64:1	0.860833	0.377994
CL(16:0_16:1_14:0_18:1)	64:2	5.2125	3.73717
CL(14:0_16:1_18:1_16:1)	64:3	73.3333	49.1347
CL(16:1_16:1_16:1_16:1)	64:4	187.625	125.879
CL(18:2_16:1_14:1_16:1)	64:5	8.1625	6.61477
CL(16:0_16:0_18:0_16:0)	66:0	0.0008	5.0922e-07
CL(16:0_16:0_16:0_18:1)	66:1	0.620833	0.211326
CL(14:0_18:1_16:0_18:1)	66:2	11.4	4.30088
CL(14:0_18:1_16:1_18:1)	66:3	78.7917	50.2499
CL(18:2_14:0_16:1_18:1)	66:4	582.083	366.69
CL(18:2_16:1_16:1_16:1)	66:5	171.917	102.913
CL(18:3_16:1_16:1_16:1)	66:6	17.2333	11.0857
CL(18:3_18:2_16:1_14:0)	66:6	2.58958	2.6123
CL(18:3_16:1_18:2_14:1)	66:7	9.575	9.00811
CL(11:1_22:6_16:1_18:1)	67:9	1.43708	2.22886
CL(18:1_16:0_16:0_18:1)	68:2	26.7833	7.511
CL(18:1_16:0_16:1_18:1)	68:3	78.625	32.5392
CL(18:1_16:1_16:1_18:1)	68:4	791.667	452.544
CL(18:2_16:1_16:1_18:1)	68:5	382.875	216.113
CL(18:2_16:1_16:1_18:2)	68:6	110.875	67.0134
CL(18:3_16:1_18:2_16:1)	68:7	19.6625	11.0246
CL(18:4_18:2_16:1_16:1)	68:8	8.9625	7.22584
CL(17:1_18:2_16:1_18:1)	69:5	97.0833	79.8458
CL(17:1_16:1_16:1_20:4)	69:7	4.02583	6.42127
CL(20:5_16:1_15:0_18:2)	69:8	2.55167	3.19179
CL(18:1_16:0_18:0_18:1)	70:2	1.99667	0.605972
CL(18:1_16:0_18:1_18:1)	70:3	132.333	60.1899
CL(18:1_16:1_18:1_18:1)	70:4	352	149.202
CL(18:2_18:1_16:1_18:1)	70:5	432.083	213.465
CL(18:2_16:1_18:1_18:2)	70:6	180.75	102.863
CL(18:3_18:1_16:1_18:2)	70:7	22.5708	22.4413
CL(18:2_16:1_16:1_20:4)	70:8	14.35	8.75859
CL(20:5_18:2_16:1_16:1)	70:9	7.2125	5.5505
CL(17:1_18:1_18:2_18:1)	71:5	63.0833	38.8535
CL(17:1_18:2_16:1_20:3)	71:7	6.59167	9.78212
CL(17:1_18:2_16:1_20:4)	71:8	3.42292	4.47146
CL(18:2_16:1_16:1_22:6)	72:10	2.63375	1.51442
CL(18:1_18:1_18:1_18:1)	72:4	50.7917	14.9253
CL(18:2_18:1_18:1_18:1)	72:5	112	36.9745
CL(18:2_18:1_18:1_18:2)	72:6	125.708	57.8984
CL(18:2_18:1_16:1_20:3)	72:7	57.8333	30.9504
CL(18:1_16:1_18:2_20:4)	72:8	20.0708	11.7935
CL(20:5_18:2_16:1_18:1)	72:9	4.57917	4.05238
CL(17:1_18:1_18:2_20:3)	73:7	3.75042	3.15004
CL(17:1_20:4_18:1_18:2)	73:8	2.87167	3.35118
CL(18:2_18:1_16:1_22:6)	74:10	3.94458	2.47125
CL(20:2_18:1_18:0_18:2)	74:5	5.8875	1.63409
CL(20:2_18:1_18:1_18:1)	74:5	4.19167	1.0383
CL(18:1_18:1_20:3_18:1)	74:6	15.6333	4.62983
CL(18:1_20:3_18:1_18:2)	74:7	5.775	2.37857
CL(18:2_18:1_20:3_18:2)	74:8	6.89583	3.58542
CL(18:2_18:1_16:1_22:5)	74:9	4.5125	3.73615
CL(18:2_20:3_20:3_16:1)	74:9	6.625	3.67097
CL(18:2_18:1_20:3_20:4)	76:10	4.16667e-07	5.0922e-07
CL(18:2_18:1_18:2_22:6)	76:11	4.16667e-07	5.0922e-07
CL(20:5_22:5_16:1_18:1)	76:12	0.990417	0.608009
CL(20:2_18:1_18:1_20:3)	76:7	0.87875	0.201448
CL(18:1_20:3_18:1_20:3)	76:8	2.2825	0.821882
CL(18:1_18:1_18:1_22:6)	76:9	2.00042	0.948168
Total		4375.29	2462
