# Supplementary material for: Mieap forms membraneless organelles to compartmentalize and facilitate cardiolipin metabolism
Source: Research Square preprint supplement (doi:10.21203/rs.3.rs-713092/v1), 2021-09-22
Supplement: Supplementary file 2 [file a253f9ed1dd744bb13dd96ed.xlsx]

## Sheet: Sheet1
Table S2. Oligonucleotides used in this paper, Related to STAR methods
Primers
Name	Sequence
N-EGFP-Mieap-F	5′-CGGGGTACCGCGGAAAACCTGAAAAGACT-3′
N-EGFP-Mieap-R	5′-CGGGGTACCTTAAAATCTTGGCAATCCACAT-3′
C-EGFP-Mieap-F	5′-AAAAAGCTTAGCGATGGCGGAAAACCTGA-3′
C-EGFP-Mieap-R	5′-AAAAAGCTTAAATCTTGGCAATCCACATC-3′
N-FLAG-Mieap-F	5′-GGGGTACCAGCGATGGCGGAAAACCTGA-3′
N-FLAG-Mieap-R	5′-GGGGTACCCTGGTGCTTTTAAAATCTTGGC-3′
Mut-F1	5′-CAAGTCCGGACTCAGGTCTCGAGCCCAAGCTTCGAATTCT-3′
Mut-R1	5′-AGAATTCGAAGCTTGGGCTCGAGACCTGAGTCCGGACTTG-3′
Mut-F2	5′-TCTCGAGCTCAAGCTTCGAACTCTGCCGTCGACGGTAC-3′
Mut-R2	5′-GTACCGTCGACGGCAGAGTTCGAAGCTTGAGCTCGAGA-3′
Mut-F3	5′-CCCCTCTCTGCAGCGCAGCAGATCTG-3′
Mut-R3	5′-CAGATCTGCTGCGCTGCAGAGAGGGG-3′
BNIP3-F	5′-CCGGAATTCTCGCAGAACGGAGCGCCCG-3′
BNIP3-R	5′-CCGCTCGAGTCAAAAGGTGCTGGTGGAGGT-3′
NIX-F	5′-CCGGAATTCTCGTCCCACCTAGTCGAGCC-3′
NIX-R	5′-CCGCTCGAGTCAGTAGGTGCTGGCAGAGG-3′
GST-Mieap-F	5′-GAATTCAGGTCCCCTCTCTGCAGG-3′
GST-Mieap-R	5′-CTCGAGGCGCGCCACATTGGACAG-3′
Cytochrome c-F	5′-TTTGAATTCAATGGGTGATGTTGAG-3′
Cytochrome c-R	5′-TTTGGATCCTTACTCATTAGTAGCT-3′
N-EGFP-F	5′-AAATAAATAAGCTTGCCACCATGGTGAGCAAGGGCGAGGAGCTGT-3′
N-EGFP-R	5′-AAATAAATGATATCGAATTCGGATCCCTTGTACAGCTCGTCCATGCCGAGA-3′
C-EGFP-F	5′-AAATAAATGGATCCATGGTGAGCAAGGGCGAGGAGCTGT-3′
C-EGFP-R	5′-AAATAAATGCGGCCGCTTACTTGTACAGCTCGTCCATGCCG-3′
ATP5F1B-F1	5′-AAATAAATAAGCTTGCCACCATGTTGGGGTTTGTGGGTCGGGTGG-3′
ATP5F1B-R1	5′-AAATAAATGATATCCTGGAGGGATTTGTAGTCCTGCAGG-3′
ATP5F1B-F2	5′-AAATAAATGATATCATTGCCATCCTGGGTATGGATGAAC-3′
ATP5F1B-R2	5′-AAATAAATGGATCCCGATGAATGCTCTTCAGCCAGCTTA-3′
PHB2-F1	5′-AAATAAATGCTAGCGCCACCATGGCCCAGAACTTGAAGGACTTGG-3′
PHB2-R1	5′-AAATAAATGGTACCTTTCTTACCCTTGATGAGGCTGTCA-3′
TAMM41-F	5′-AAATAAATGCTAGCGCCACCATGGCGCTGCAGACGCTGCAGAGCT-3′
TAMM41-R	5′-AAATAAATGGATCCCCATTTAGAGAAATGGCAGTAACAA-3′
PGS1-F	5′-AAATAAATAAGCTTGCCACCATGGCGGTGGCGGCGGCAGCTGCGG-3′
PGS1-R	5′-AAATAAATGGATCCGAAGAAGTTCTTGATCAGTGGAGTC-3′
PTPMT1-F	5′-AAATAAATGCTAGCGCCACCATGGCGGCCACCGCGCTGCTGGAGG-3′
PTPMT1-R	5′-AAATAAATAAGCTTTGTCTTTGAAATGACAAAAGTCCCA-3′
CRLS1-F	5′-AAATAAATGGATCCATGCTAGCCTTGCGCGTGGCGCGCG-3′
CRLS1-R	5′-AAATAAATGCGGCCGCTCAGTCTTTTATCACCTGAACAGTC-3′
PLA2G6-F	5′-AAATAAATGCTAGCGCCACCATGCAGTTCTTTGGCCGCCTGGTCA-3′
PLA2G6-R	5′-AAATAAATGGTACCGGGTGAGAGCAGCAGCTGGATGAGC-3′
TAZ-F	5′-AAATAAATGCTAGCGCCACCATGCCTCTGCACGTGAAGTGGCCGT-3′
TAZ-R	5′-AAATAAATGGTACCTCTCCCAGGCTGGAGGTGGTTGTGG-3′
PRELI-F	5′-AAATAAATGCTAGCGCCACCATGGTGAAGTATTTCCTGGGCCAGA-3′
PRELI-R	5′-AAATAAATGGATCCCACAAACTGTTGCTGCTGCTGCTGC-3′
LONP1-F	5′-AAATAAATAAGCTTGCCACCATGGCGGCGAGCACTGGCTACGTGC-3′
LONP1-R	5′-AAATAAATGGATCCCCGTTCCACGGCCAGCGCCTCTGCC-3′
PLD6-F	5′-AAATAAATGCTAGCGCCACCATGGGACGGTTGAGTTGGCAGGTGG-3′
PLD6-R	5′-AAATAAATGGTACCGGTTTGGCTTTCGCTGGAGGTGCCG-3′
shRNA
Name	Sequence
shRNA Mieap	5′-GATCCCCGGAACTCACTCAAGCAGAATTCAAGAGATTCTGCTTGAGTGAGTTCCTTTTTGGAAA-3′
